# Supplementary material for: Strategies for the Covalent Anchoring of a BMP-2-Mimetic Peptide to PEEK Surface for Bone Tissue Engineering
Source: MDPI journal article supplement (doi:10.3390/ma16103869), 2023-05-21
Supplement: s1 [file s1]

## Strategies for the Covalent Anchoring of a BMP-2-Mimetic Peptide to PEEK Surface for Bone Tissue Engineering

Table S1. XPS results.

| Sample         | Signal     | Assignment           | BE (eV)              | FWHM  | Internal Atomic ratios (%) | Atomic ratios |
|----------------|------------|----------------------|----------------------|-------|----------------------------|---------------|
| PEEK-Controllo | C1s        | C <sub>ar</sub> ,C-C | 284.7                | 1.52  | 73                         | 0.61          |
|                |            | C-O                  | 286.3                |       | 23                         | 0.19          |
|                |            | C=O                  | 287.7                |       | 4                          | 0.03          |
|                | O1s        | C=O                  | 531.4                | 1.79  | 51                         | 0.08          |
|                |            | C-O                  | 533.4                |       | 49                         | 0.08          |
| PEEK-AoaBMP    | C1s        | C <sub>ar</sub> ,C-C | 284.7                | 1.67  | 56                         | 0.38          |
|                |            | C-N, C-O             | 286.1                |       | 26                         | 0.18          |
|                |            | C=O                  | 287.7                |       | 14                         | 0.09          |
|                |            | N-C=O                | 288.9                |       | 4                          | 0.03          |
|                | N1s        | C=N                  | 398.0                | 1.92  | 4                          | 0.005         |
|                |            | C-N                  | 399.8                |       | 87                         | 0.09          |
|                |            | -N <sup>+</sup>      | 401.6                |       | 9                          | 0.009         |
|                | O1s        | C=O                  | 531.5                | 2.16  | 72                         | 0.16          |
|                |            | C-O                  | 533.1                |       | 28                         | 0.06          |
|                | PEEK-N3BMP | C1s                  | C <sub>ar</sub> ,C-C | 284.7 | 1.68                       | 56            |
| C-N, C-O       |            |                      | 286.1                | 27    |                            | 0.18          |
| C=O            |            |                      | 287.8                | 14    |                            | 0.10          |
| N-C=O          |            |                      | 288.7                | 5     |                            | 0.02          |
| N1s            |            | C=N                  | 397.6                | 1.90  | 3                          | 0.003         |
|                |            | C-N                  | 399.7                |       | 90                         | 0.10          |
|                |            | -N <sup>+</sup>      | 401.7                |       | 7                          | 0.009         |
| O1s            |            | C=O                  | 531.5                | 2.16  | 78                         | 0.16          |
|                |            | C-O                  | 533.2                |       | 22                         | 0.04          |

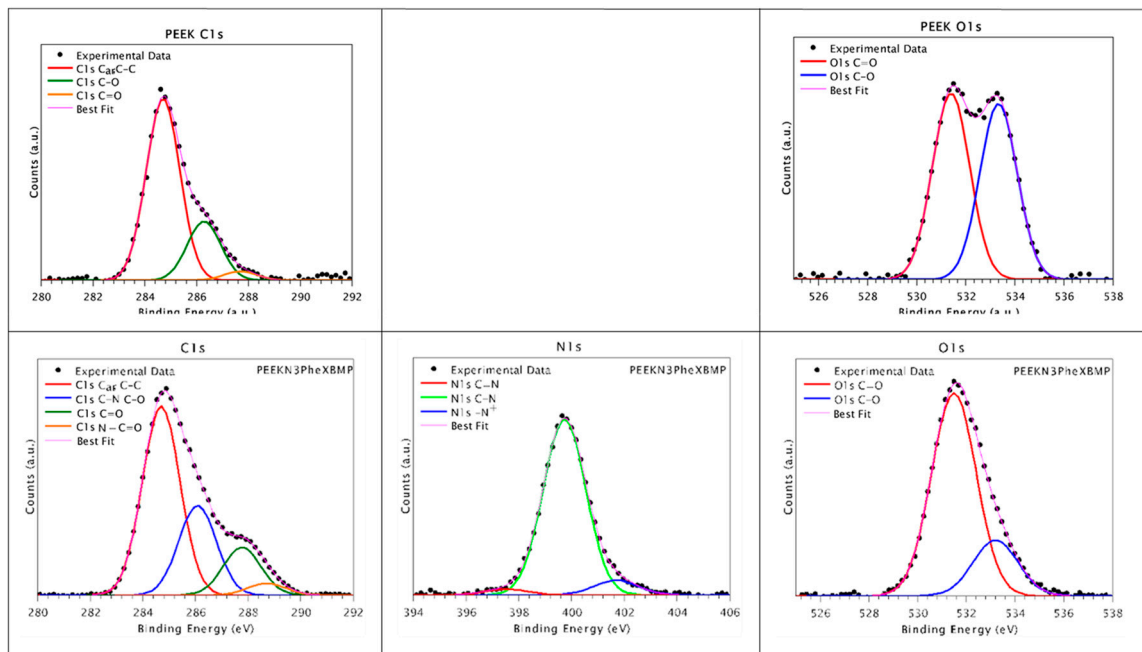

Figure S1. XPS spectra and peak fit results of sample PEEK and PEEK-N3BMP

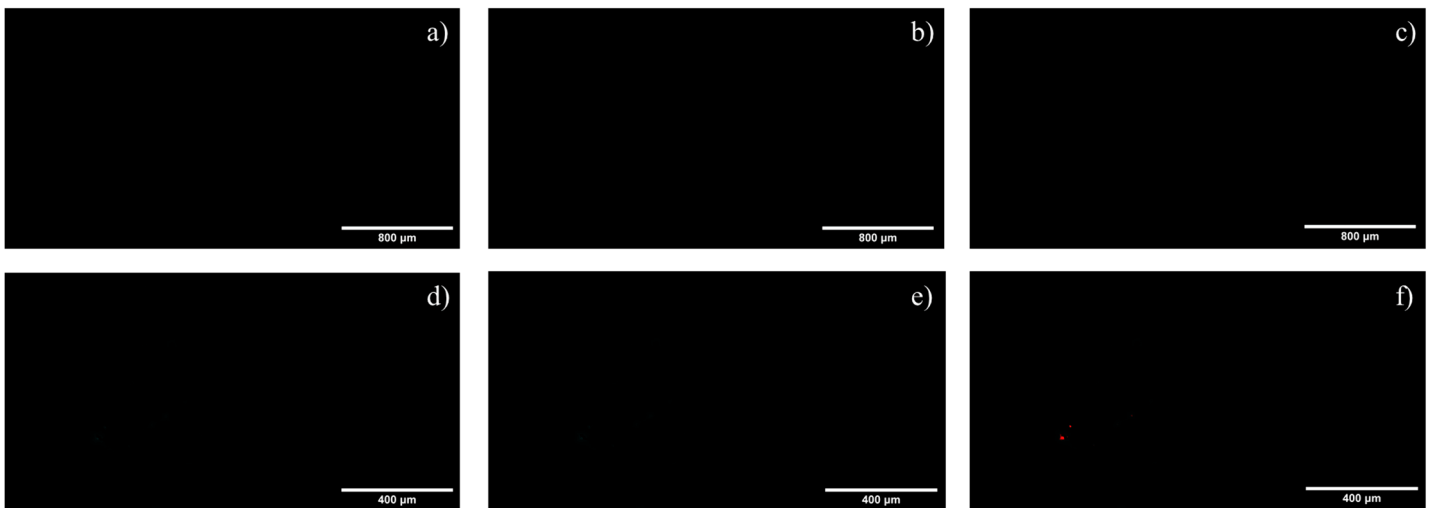

Figure S2. Live and Dead staining of human osteoblasts cultured for 48 hours on non-functionalized (a and d) and functionalized PEEK (through amino-oxy b and e; through azido group c and f). Only dead cells are here reported (in red). Dead cells are visible only in f.
